# Supplementary material for: Determination of Bioactive Compounds in Sequential Extracts of Chia Leaf (Salvia hispanica L.) Using UHPLC-HRMS (Q-Orbitrap) and a Global Evaluation of Antioxidant In Vitro Capacity
Source: MDPI journal article supplement (doi:10.3390/antiox10071151), 2021-07-20
Supplement: s1 [file s1]

## Supplementary Materials

Table S1: Phenolic accurate mass database employed for chia leaf methanolic extract screening.

| Compound                       | Formula        | [M-H] <sup>-</sup> exact <i>m/z</i> value |
|--------------------------------|----------------|-------------------------------------------|
| 2',3,4,4'-Tetrahydroxychalcone | C15H12O5       | 271.0612                                  |
| 4-coumaroyl-CoA                | C30H42N7O18P3S | 912.1447                                  |
| 7-Hydroxyisoflavone            | C15H10O3       | 237.0557                                  |
| Acetyl orientin                | C23H22O12      | 489.1039                                  |
| Apiforol                       | C15H14O5       | 273.0769                                  |
| Caffeic acid                   | C9H8O4         | 179.0350                                  |
| Catechin                       | C15H14O6       | 289.0718                                  |
| Chlorogenic acid               | C16H18O9       | 353.0878                                  |
| Cinnamic Acid                  | C9H8O2         | 147.0452                                  |
| Citric acid                    | C6H8O7         | 191.0197                                  |
| Coumaric acid-O-hexose         | C15H18O8       | 325.0929                                  |
| Coumaroyl quinic acid          | C16H18O8       | 337.0929                                  |
| Daidzein                       | C15H10O4       | 253.0506                                  |
| Dihydrokaempferol              | C15H12O6       | 287.0561                                  |
| Dihydromyricetin               | C15H12O8       | 319.0459                                  |
| Dihydroquercetin               | C15H12O7       | 303.0510                                  |
| Dimethyl quercetin             | C17H14O7       | 329.0667                                  |
| Ellagic Acid                   | C14H6O8        | 300.9990                                  |
| Ellagic acid glucoside         | C20H18O13      | 465.0675                                  |
| Eriodictyol                    | C15H12O6       | 287.0561                                  |
| Eucine/Esoleucine              | C6H13NO2       | 130.0874                                  |
| Ferulic acid                   | C10H10O4       | 193.0506                                  |
| Genistein                      | C15H10O5       | 269.0456                                  |
| Hesperidin                     | C28H34O15      | 609.1825                                  |
| Hesperitin                     | C16H14O6       | 301.0718                                  |
| Kaempferol                     | C15H10O6       | 285.0405                                  |
| Leucoanthocyanidin             | C15H14O8       | 321.0616                                  |
| Liquiritigenin                 | C15H12O4       | 255.0663                                  |
| Luteoforol                     | C15H14O6       | 289.0718                                  |
| Luteolin                       | C15H10O6       | 285.0405                                  |
| Luteolin-7-O-glucoside         | C21H20O11      | 447.0933                                  |
| Luteolin-O-glucuronide         | C21H18O12      | 461.0726                                  |
| Malonyl-CoA                    | C24H38N7O19P3S | 852.1083                                  |
| Medicarpin                     | C16H14O4       | 269.0819                                  |

|                           |                                                               |          |
|---------------------------|---------------------------------------------------------------|----------|
| Myricetin                 | C <sub>15</sub> H <sub>10</sub> O <sub>8</sub>                | 317.0303 |
| Naringenin                | C <sub>15</sub> H <sub>12</sub> O <sub>5</sub>                | 271.0612 |
| Orientin                  | C <sub>21</sub> H <sub>20</sub> O <sub>11</sub>               | 447.0933 |
| <i>p</i> -Coumaric acid   | C <sub>9</sub> H <sub>8</sub> O <sub>3</sub>                  | 163.0401 |
| Phenylalanine             | C <sub>9</sub> H <sub>11</sub> NO <sub>2</sub>                | 164.0717 |
| Polydatin                 | C <sub>20</sub> H <sub>22</sub> O <sub>8</sub>                | 389.1242 |
| Protocatechuic acid       | C <sub>7</sub> H <sub>6</sub> O <sub>4</sub>                  | 153.0193 |
| Quercetin                 | C <sub>15</sub> H <sub>10</sub> O <sub>7</sub>                | 301.0354 |
| Resveratrol               | C <sub>14</sub> H <sub>12</sub> O <sub>3</sub>                | 227.0714 |
| Rosmarinic acid           | C <sub>18</sub> H <sub>16</sub> O <sub>8</sub>                | 359.0772 |
| Salvianolic acid F isomer | C <sub>17</sub> H <sub>14</sub> O <sub>6</sub>                | 313.0718 |
| Sinapic acid              | C <sub>11</sub> H <sub>12</sub> O <sub>5</sub>                | 223.0612 |
| Trihydroxychalone         | C <sub>15</sub> H <sub>12</sub> O <sub>4</sub>                | 255.0663 |
| Tryptophan                | C <sub>11</sub> H <sub>12</sub> N <sub>2</sub> O <sub>2</sub> | 203.0826 |
| Vitexin                   | C <sub>21</sub> H <sub>20</sub> O <sub>10</sub>               | 431.0984 |

---
